# Supplementary material for: Combining heterogeneous data sources for neuroimaging based diagnosis: re-weighting and selecting what is important
Source: PubMed Central journal article supplement (PMC6547052; doi:10.1016/j.neuroimage.2019.01.053), 2019-07-15
Supplement: mmc1.pdf [file mmc1.pdf]

# Combining heterogeneous data sources for neuroimaging based diagnosis: re-weighting and selecting what is important

Michele Donini<sup>a,\*</sup>, João M. Monteiro<sup>b,c</sup>, Massimiliano Pontil<sup>a,c</sup>, Tim Hahn<sup>d</sup>,  
Andreas J. Fallgatter<sup>e</sup>, John Shawe-Taylor<sup>c</sup>, Janaina Mourão-Miranda<sup>b,f</sup>,  
for the Alzheimer’s Disease Neuroimaging Initiative<sup>†</sup>

<sup>a</sup>*Computational Statistics and Machine Learning (CSML),  
Istituto Italiano di Tecnologia, Genova, Italy*

<sup>b</sup>*Max Planck University College London Centre for Computational Psychiatry and Ageing  
Research, University College London, UK*

<sup>c</sup>*Department of Computer Science, University College London, United Kingdom*

<sup>d</sup>*Department of Psychiatry and Psychotherapy, University of Münster, Germany*

<sup>e</sup>*Department of Psychiatry and Psychotherapy, University Hospital Tuebingen, Germany*

<sup>f</sup>*Centre for Medical Image Computing, Department of Computer Science, University  
College London, UK.*

---

*Keywords:* Multiple kernel learning, feature selection, neuroimaging.

---

## Supplementary Material

In this section we present the results of the same experiments described in  
the main paper with the difference that the algorithms can use all the clinical  
information without any restriction. In the following the results for both the  
5 datasets, i.e. ADNI and Depression.

### 0.1. ADNI

The accuracy results for the ADNI dataset are presented in Table 1.

Figure 1 shows the assigned weights of the clinical information by using all  
the clinical features.

---

\*Corresponding author

*Email address:* [michele.donini@iit.it](mailto:michele.donini@iit.it) (Michele Donini)

<sup>†</sup> Data used in preparation of this article were obtained from the Alzheimer’s Disease  
Neuroimaging Initiative (ADNI) database ([adni.loni.usc.edu](http://adni.loni.usc.edu)). As such, the investigators  
within the ADNI contributed to the design and implementation of ADNI and/or provided  
data but did not participate in analysis or writing of this report. A complete listing of ADNI  
investigators can be found at: [adni.loni.usc.edu/wp-content/uploads/how\\_to\\_apply/ADNI\\_](http://adni.loni.usc.edu/wp-content/uploads/how_to_apply/ADNI_Acknowledgement_List.pdf)  
[Acknowledgement\\_List.pdf](http://adni.loni.usc.edu/wp-content/uploads/how_to_apply/ADNI_Acknowledgement_List.pdf)

|          | Algorithm  | Kernels                          | R      | Bal. Acc. %      |
|----------|------------|----------------------------------|--------|------------------|
| Baseline | Linear SVM | $\mathbf{C}$                     | 1      | $68.73 \pm 9.68$ |
|          | SVM        | $\mathbf{I} + \mathbf{C}$        | 1      | $84.80 \pm 6.87$ |
| FS       | SVM RFE    | $\mathcal{V} \ \& \ \mathcal{C}$ | –      | $86.93 \pm 4.76$ |
|          | SVM t-test | $\mathcal{V} \ \& \ \mathcal{C}$ | –      | $86.47 \pm 6.92$ |
| MKL      | SimpleMKL  | $\mathbf{I} \ \& \ \mathcal{C}$  | 36     | $84.44 \pm 6.68$ |
|          | EasyMKL    | $\mathbf{I} \ \& \ \mathcal{C}$  | 36     | $84.78 \pm 6.76$ |
| FW       | SimpleMKL  | $\mathcal{V} \ \& \ \mathcal{C}$ | 168165 | Out of memory    |
|          | EasyMKL    | $\mathcal{V} \ \& \ \mathcal{C}$ | 168165 | $88.80 \pm 7.02$ |
| FWS      | EasyMKLFS  | $\mathcal{V} \ \& \ \mathcal{C}$ | 168165 | $96.14 \pm 3.55$ |

Table 1: ADNI Dataset: comparisons of 5 repetitions of a nested 10-fold cross-validation balanced accuracy using all the clinical information. The results are divided in 5 families: Baseline, Feature Selection (FS), standard Multiple Kernel Learning (MKL), Feature Weighting by using MKL (FW) and our method in Feature Weighting and Selection (FWS). R corresponds to the number of kernels used.

10 Finally, in Figure 2 it is possible to note the importance of the clinical data compared to the weight assigned to the voxel of the MRI images.

### 0.2. Depression

The accuracy results for the Depression dataset are presented in Table 2.

15 Figure 3 and 4 depict the assigned weights of the clinical information by using all the clinical features and the ration between the weight assigned to the clinical data with respect to the weight assigned to the different fMRIs.

|          | Algorithm  | Kernels                      | R      | Bal. Acc. %       |
|----------|------------|------------------------------|--------|-------------------|
| Baseline | Linear SVM | <b>C</b>                     | 1      | $83.33 \pm 15.71$ |
|          | SVM        | <b>I + C</b>                 | 1      | $67.00 \pm 14.87$ |
| FS       | SVM RFE    | $\mathcal{V} \& \mathcal{C}$ | –      | $65.24 \pm 11.34$ |
|          | SVM t-test | $\mathcal{V} \& \mathcal{C}$ | –      | $63.89 \pm 10.32$ |
| MKL      | SimpleMKL  | <b>I &amp; C</b>             | 49     | $84.65 \pm 12.88$ |
|          | EasyMKL    | <b>I &amp; C</b>             | 49     | $84.56 \pm 13.02$ |
| FW       | SimpleMKL  | $\mathcal{V} \& \mathcal{C}$ | 713864 | Out of memory     |
|          | EasyMKL    | $\mathcal{V} \& \mathcal{C}$ | 713864 | $84.55 \pm 12.19$ |
| FWS      | EasyMKLFS  | $\mathcal{V} \& \mathcal{C}$ | 713864 | $84.21 \pm 10.72$ |

Table 2: Depression Dataset: comparisons of 5 repetitions of a nested 10-fold cross-validation balanced accuracy using all the clinical information. The results are divided in 5 families: Baseline, Feature Selection (FS), standard Multiple Kernel Learning (MKL), Feature Weighting by using MKL (FW) and our method in Feature Weighting and Selection (FWS). R corresponds to the number of kernels used.

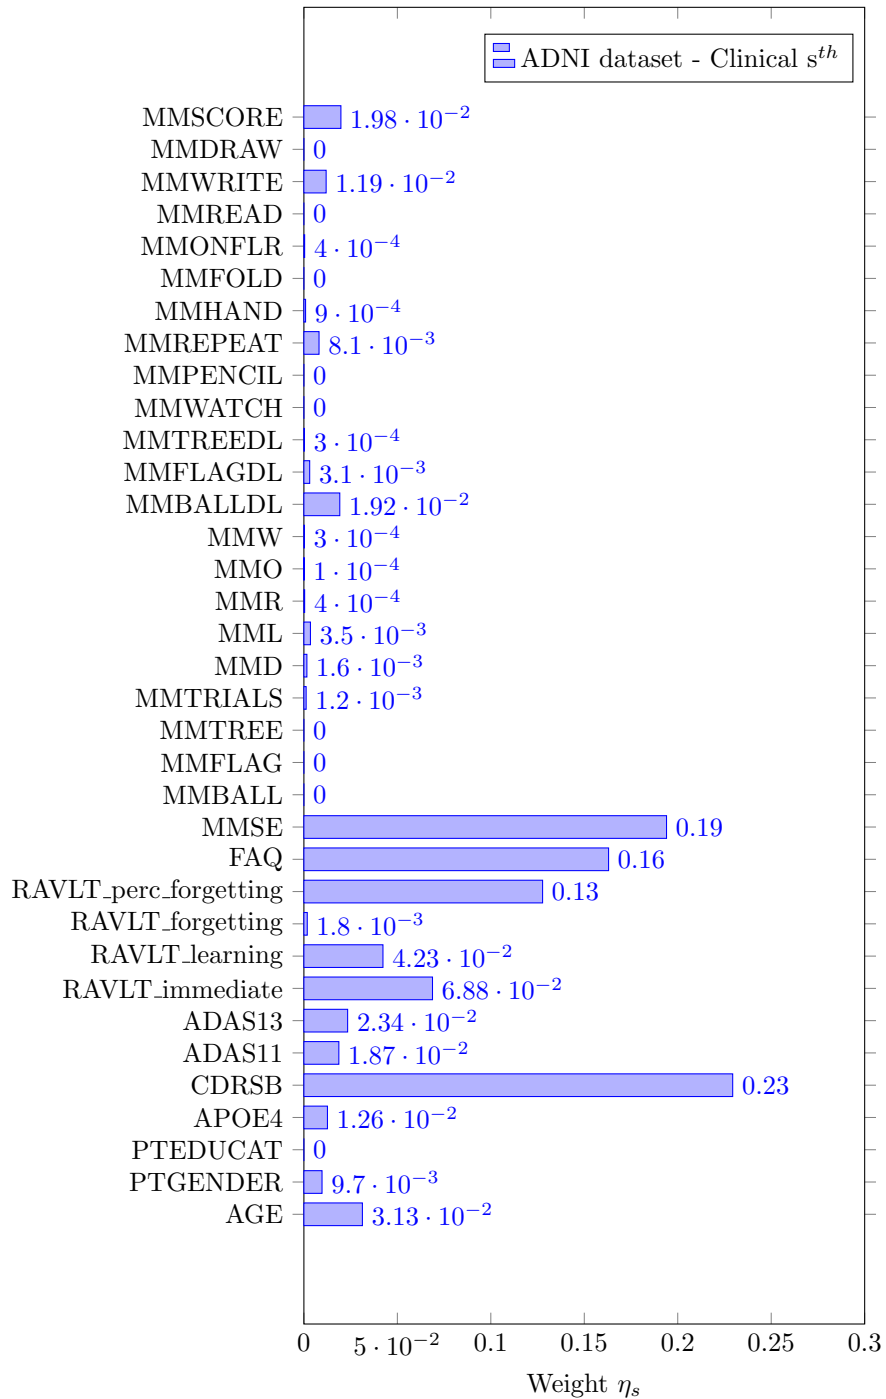

Figure 1: EasyMKL assigned weights for the all the clinical information for the ADNI dataset.

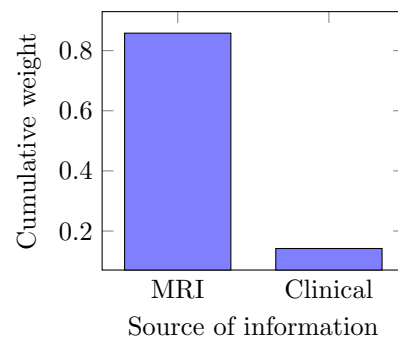

Figure 2: EasyMKLFS assigned weights for the different sources of information: MRI image and all the clinical measurements.

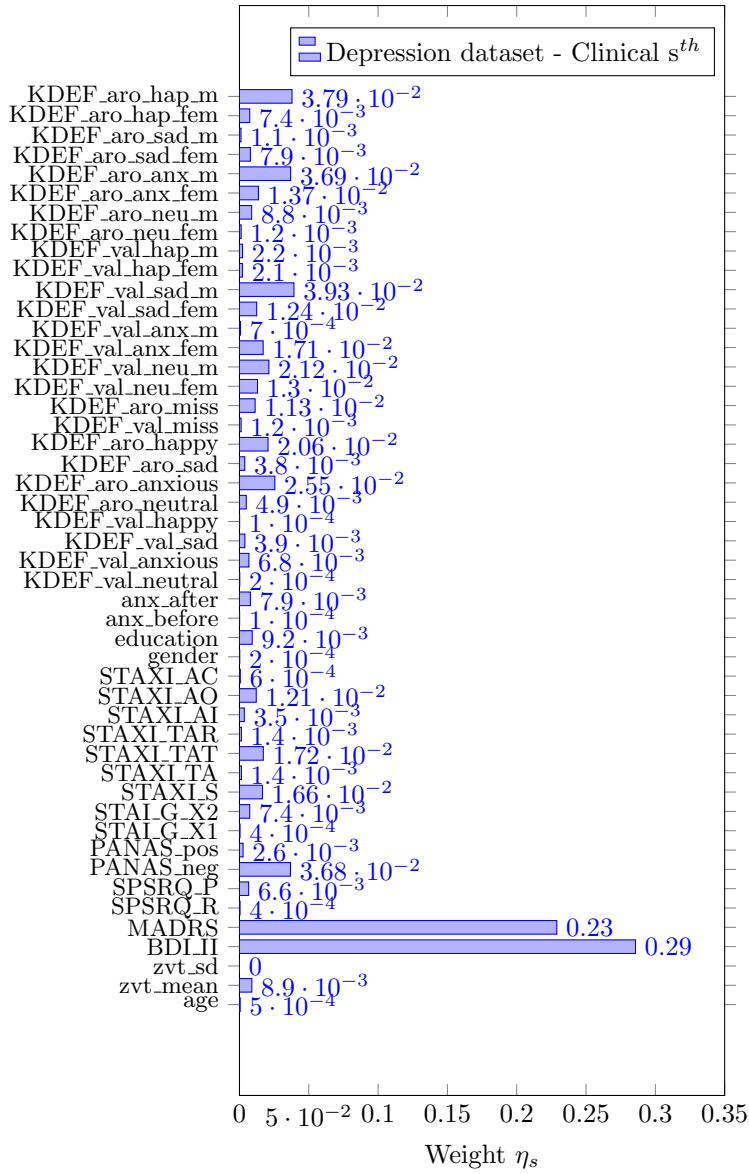

Figure 3: EasyMKL assigned weights for the clinical information for the Depression dataset.

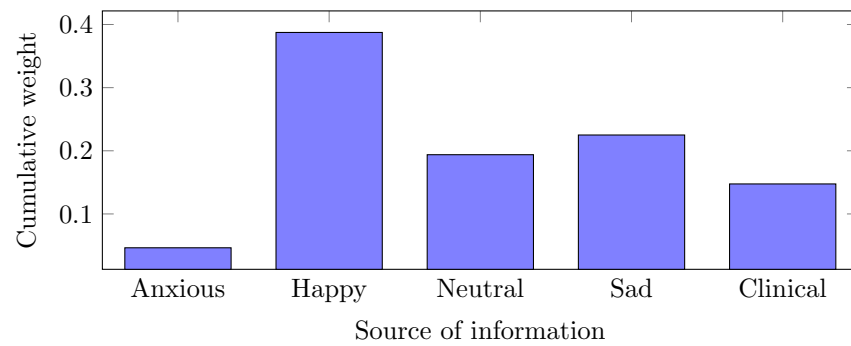

Figure 4: EasyMKLFS assigned weights for the different sources of information of the Depression dataset: Anxious image, Happy image, Neutral image, Sad image and clinical measurements.
